# Supplementary material for: Highly active thiol-functionalized SBA-15 supported palladium catalyst for Sonogashira and Suzuki–Miyaura cross-coupling reactions
Source: Royal Society of Chemistry journal article supplement (doi:10.1039/c4ra13322f), 2014-11-27
Supplement: c4ra13322f1.pdf [file c4ra13322f1.pdf]

## Highly Active Thiol-Functionalized SBA-15 Supported Palladium Catalyst for Sonogashira and Suzuki-Miyaura Cross-Coupling Reactions

Shaheen M. Sarkar,\* Md Lutfor Rahman, Mashitah Mohd Yusoff

Faculty of Industrial Sciences and Technology, University Malaysia Pahang, Gambang 26300,  
Kuantan, Malaysia

\*Corresponding author: E-mail: sha\_inha@yahoo.com

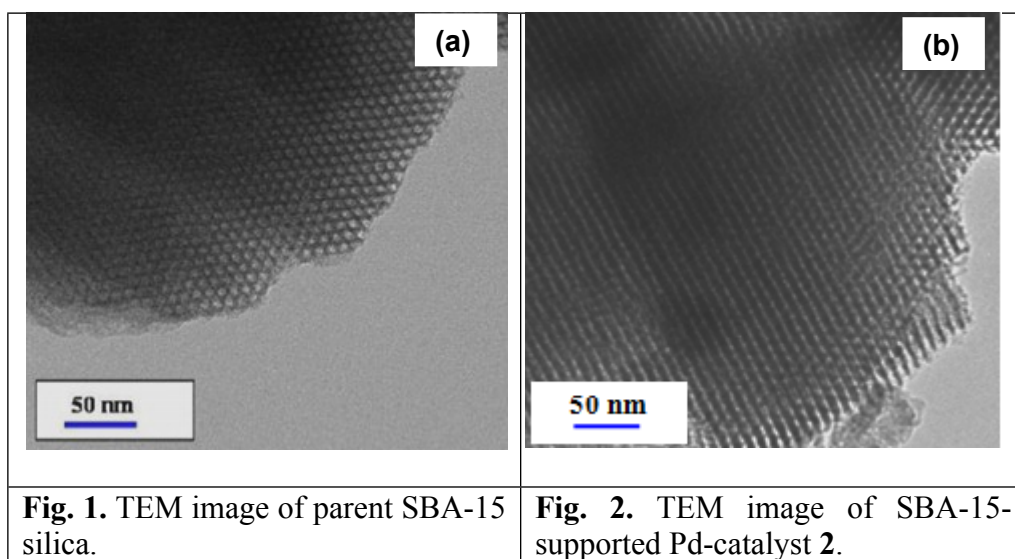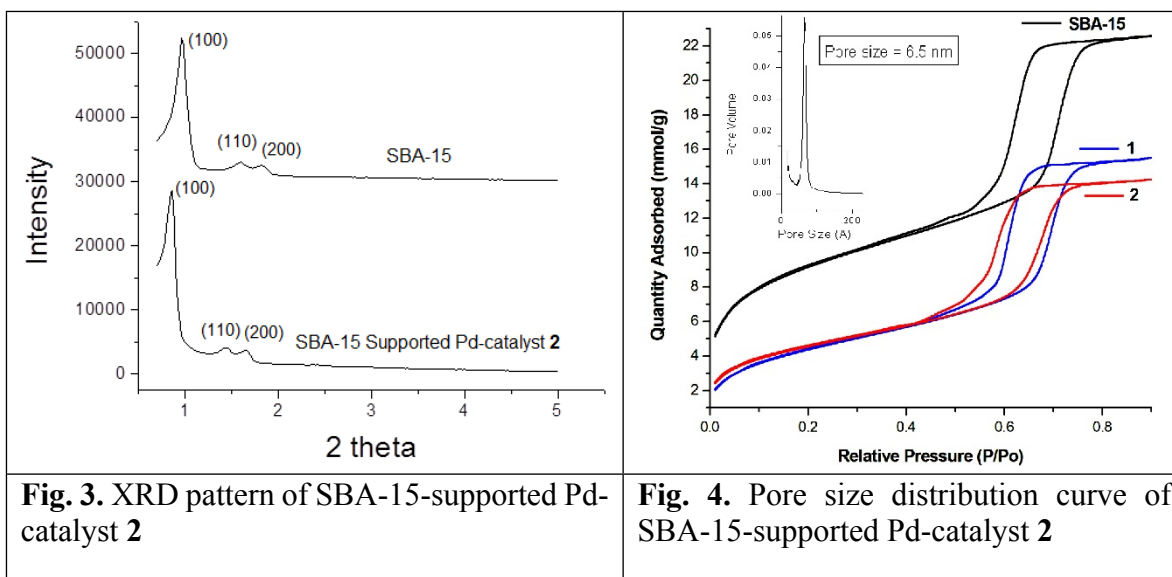

**Table 1.** Structural characteristics of SBA-15-supported Pd-catalyst **2**

| Sample   | Surface area<br>(m <sup>2</sup> /g) | Pore diameter<br>(nm) | Pore volume<br>(cm <sup>3</sup> /g) | Loading amount<br>(mmol/g) |
|----------|-------------------------------------|-----------------------|-------------------------------------|----------------------------|
| SBA-15   | 750                                 | 8.33                  | 0.83                                | -                          |
| <b>1</b> | 591                                 | 7.73                  | 0.55                                | 0.4                        |
| <b>2</b> | 465                                 | 6.50                  | 0.38                                | 0.16                       |

**Diphenylacetylene 3a** [1]: <sup>1</sup>H NMR (CDCl<sub>3</sub>, 400 MHz) δ: 7.52-7.47 (m, 4H), 7.35-7.28 (m, 6H). <sup>13</sup>C NMR (CDCl<sub>3</sub>, 125 MHz) δ: 131.5, 128.1, 128.1, 123.2, 89.6. EI-MS *m/z* = 178 (M<sup>+</sup>).

**Phenyl-*p*-tolylacetylene 3b** [2]: <sup>1</sup>H NMR (CDCl<sub>3</sub>, 400 MHz) δ: 7.51-7.49 (m, 2 H), 7.42 (d, *J* = 7.89 Hz, 2 H), 7.32-7.26 (m, 3 H), 7.12 (d, *J* = 7.88 Hz, 2 H), 2.32 (s, 3H). <sup>13</sup>C NMR (CDCl<sub>3</sub>, 125 MHz) δ: 138.2, 131.4, 129.2, 128.3, 128.3, 123.4, 120.3, 89.7, 88.6, 21.5. EI-MS *m/z* = 192 (M<sup>+</sup>).

**4-Methoxyphenyl-phenylacetylene 3c** [3]: <sup>1</sup>H NMR (CDCl<sub>3</sub>, 400 MHz) δ: 7.51-7.47 (m, 4 H), 7.35-7.31 (m, 3 H), 6.85 (dd, *J* = 8.78, 2.2 Hz, 2 H), 3.83 (s, 3 H). <sup>13</sup>C NMR (CDCl<sub>3</sub>, 125 MHz) δ: 159.3, 133.2, 131.2, 128.4, 127.8, 123.6, 115.4, 114.0, 89.4, 88.1, 55.2. EI-MS *m/z* = 208 (M<sup>+</sup>).

**4-Acetylphenyl-phenylacetylene 3d** [4]: <sup>1</sup>H NMR (CDCl<sub>3</sub>, 400 MHz) δ: 7.92 (d, *J* = 8.49 Hz, 2 H), 7.60 (d, *J* = 8.49 Hz, 2 H), 7.55-7.53 (m, 2H), 7.37-7.34 (m, 3 H), 2.59 (s, 3H). <sup>13</sup>C NMR (CDCl<sub>3</sub>, 125 MHz) δ: 197.2, 136.3, 131.9, 131.7, 128.9, 128.6, 128.1, 128.1, 122.5, 92.8, 88.4, 26.7. EI-MS *m/z* = 220 (M<sup>+</sup>).

**4-Cyanophenyl-phenylacetylene 3e** [5]: <sup>1</sup>H NMR (CDCl<sub>3</sub>, 400 MHz) δ: 7.66-7.59 (m, 4 H), 7.57-7.54 (m, 2 H), 7.41-7.38 (m, 3 H). <sup>13</sup>C NMR (CDCl<sub>3</sub>, 125 MHz) δ: 132.1, 131.7, 129.2, 128.6, 128.3, 122.3, 118.6, 111.5, 93.8, 87.8. EI-MS *m/z* = 203 (M<sup>+</sup>).

**4-Nitrophenyl-phenylacetylene 3f** [6]: <sup>1</sup>H NMR (CDCl<sub>3</sub>, 400 MHz) δ: 8.20 (d, *J* = 8.92 Hz, 2 H), 7.65 (d, *J* = 8.90 Hz, 2 H), 7.57-7.54 (m, 2 H), 7.41-7.37 (m, 3H). <sup>13</sup>C NMR (CDCl<sub>3</sub>, 125 MHz) δ:

147.1, 132.1, 131.9, 130.3, 129.3, 128.6, 123.8, 122.1, 94.8, 87.6. EI-MS  $m/z = 223$  ( $M^+$ ).

**4-Trifluoromethylphenyl-phenylacetylene 3g** [7]:  $^1\text{H NMR}$  ( $\text{CDCl}_3$ , 400 MHz)  $\delta$ : 7.64-7.61 (m, 4 H), 7.58-7.55 (m, 2 H), 7.38-7.35 (m, 3 H).  $^{13}\text{C NMR}$  ( $\text{CDCl}_3$ , 125 MHz)  $\delta$ : 131.9, 131.8, 130.0 ( $J = 54.66$  Hz), 128.9, 128.5, 127.2 ( $J = 2.0$  Hz), 125.4 ( $J = 6.16$  Hz), 123.8, 122.6, 91.8, 87.7. EI-MS  $m/z = 246$  ( $M^+$ ).

**4-Methoxybiphenyl 4a** [8]:  $^1\text{H NMR}$  (500 MHz,  $\text{CDCl}_3$ )  $\delta = 3.83$  (s, 3 H), 6.97 (d,  $J = 8.6$  Hz, 2 H), 7.30 (t,  $J = 8.0$  Hz, 1 H), 7.42 (t,  $J = 8.0$  Hz, 2 H), 7.51-7.55 (m, 4 H);  $^{13}\text{C NMR}$  (125 MHz,  $\text{CDCl}_3$ )  $\delta = 55.2$ , 114.2, 126.7, 128.1, 128.2, 128.7, 133.7, 140.8, 159.1; FTIR ( $\text{cm}^{-1}$ ): 3032, 3010, 2836, 1609, 1518, 1485, 1440, 1291, 1261, 1245, 1215, 1043, 833, 746, 719, 697; MS-EI,  $m/z$  184 ( $M^+$ ).

**4-Methylbiphenyl 4b** [9]:  $^1\text{H NMR}$  (500 MHz,  $\text{CDCl}_3$ )  $\delta = 2.39$  (s, 3 H), 7.25 (d,  $J = 8.0$  Hz, 2 H), 7.31 (t,  $J = 7.4$  Hz, 1 H), 7.42 (t,  $J = 7.4$  Hz, 2 H), 7.49 (d,  $J = 8.0$  Hz, 2 H), 7.58 (d,  $J = 8.0$  Hz, 2 H);  $^{13}\text{C NMR}$  (125 MHz,  $\text{CDCl}_3$ )  $\delta = 21.0$ , 126.9, 127.0, 128.6, 129.4, 137.0, 138.3, 141.1; FTIR ( $\text{cm}^{-1}$ ): 3031, 2920, 2859, 1601, 1518, 1486, 1445, 1216, 1111, 1038, 1007, 821, 746, 696; MS-EI,  $m/z$  168 ( $M^+$ ).

**Biphenyl-4-ol 4c** [9]:  $^1\text{H NMR}$  (500 MHz,  $\text{CDCl}_3$ )  $\delta = 4.96$  (brs, 1 H), 6.62 (d,  $J = 8.6$  Hz, 2 H), 6.91 (d,  $J = 8.6$  Hz, 1 H), 7.30 (t,  $J = 7.4$  Hz, 1 H), 7.41 (t,  $J = 7.4$  Hz, 1 H), 7.47-7.54 (m, 4 H);  $^{13}\text{C NMR}$  (125 MHz,  $\text{CDCl}_3$ )  $\delta = 115.6$ , 126.6, 128.3, 128.7, 134.0, 140.7, 155.3; FTIR ( $\text{cm}^{-1}$ ): 3362, 3019, 1582, 1485, 1257, 1213, 1171, 1006, 822, 742, 698, 667; MS-EI,  $m/z$  170 ( $M^+$ ).

**Biphenyl-4-amine 4d** [10]:  $^1\text{H NMR}$  (500 MHz,  $\text{CDCl}_3$ )  $\delta = 3.66$  (brs, 2 H), 6.45 (d,  $J = 8.6$  Hz, 2 H), 6.75 (d,  $J = 8.6$  Hz, 1 H), 7.26 (t,  $J = 7.4$  Hz, 1 H), 7.37-7.42 (m, 4 H), 7.52 (d,  $J = 7.4$  Hz, 1 H);  $^{13}\text{C NMR}$  (125 MHz,  $\text{CDCl}_3$ )  $\delta = 115.3$ , 117.2, 126.3, 127.9, 128.6, 131.5, 135.4, 137.8, 141.0, 145.9; FTIR ( $\text{cm}^{-1}$ ): 3452, 3368, 3215, 3025, 2922, 1617, 1588, 1484, 1297, 1177, 1058, 1000, 814, 751, 689; MS-EI,  $m/z$  169 ( $M^+$ ).

**4,4'-dimethylbiphenyl 4e** [9]:  $^1\text{H NMR}$  (500 MHz,  $\text{CDCl}_3$ )  $\delta = 2.38$  (s, 6 H), 7.23 (dd,  $J = 8.0$ , 1.7 Hz, 4 H), 7.47 (dd,  $J = 8.0$ , 1.7 Hz, 4 H);  $^{13}\text{C NMR}$  (125 MHz,  $\text{CDCl}_3$ )  $\delta = 21.0$ , 126.7, 129.4,

136.6, 138.2; FTIR (cm<sup>-1</sup>): 3032, 2924, 2854, 1500, 1214, 1111, 1002, 803, 746, 668; MS-EI, m/z 182 (M<sup>+</sup>).

**4-Acetyl- 1,1'-biphenyl 4f** [11]: <sup>1</sup>H NMR (500 MHz, CDCl<sub>3</sub>) δ = 2.64 (s, 3 H), 7.47 (t, *J* = 7.4, Hz, 2 H), 7.62-7.69 (m, 5 H), 8.04 (d, *J* = 8.5 Hz, 2 H); <sup>13</sup>C NMR (125 MHz, CDCl<sub>3</sub>) δ = 26.6, 127.2, 128.1, 128.9, 129.7, 135.8, 137.9, 139.8, 145.7, 197.7; FTIR (cm<sup>-1</sup>): 3073, 3001, 1676, 1591, 1485, 1391, 1357, 1262, 1179, 1076, 1005, 958, 835, 754, 690; MS-EI, m/z 196 (M<sup>+</sup>).

**Biphenyl-4-carbonitrile 4g** [9]: <sup>1</sup>H NMR (500 MHz, CDCl<sub>3</sub>) δ = 7.44 (d, *J* = 7.4 Hz, 1 H), 7.48 (t, *J* = 8.5 Hz, 2 H), 7.59 (d, *J* = 7.4 Hz, 2 H), 7.69 (d, *J* = 8.6 Hz, 2 H), 7.73 (d, *J* = 8.6 Hz, 2 H); <sup>13</sup>C NMR (125 MHz, CDCl<sub>3</sub>) δ = 110.9, 118.9, 127.2, 127.7, 128.6, 129.0, 132.5, 139.1, 145.6; FTIR (cm<sup>-1</sup>): 3019, 2227, 1607, 1485, 1407, 1215, 1179, 1008, 842, 742, 722, 696; MS-EI, m/z 179 (M<sup>+</sup>).

## References:

- [1] L.A. Carpino, H.W. Chen, J. Am. Chem. Soc. 101 (1979) 390.
- [2] J.M. Huggins, R.G. Bergman, J. Am. Chem. Soc. 103 (1981) 3002.
- [3] L.A. Paquett, L.S. Wittenbrook, J. Am. Chem. Soc. 89 (1967) 4483.
- [4] A. Arcadi, S. Cacchi, G. Fabrizi, F. Marinelli, P. Pace, Eur. J. Org. Chem. 12 (1999) 3305.
- [5] K. Yoshida, T. Fueno, J. Org. Chem. 38 (1973) 1045.
- [6] D.H. Hunter, D.J. Cram, J. Am. Chem. Soc. 88 (1966) 5765.
- [7] J.L. Kiplinger, M.A. King, A. Fechtenkötter, A.M. Arif, T.G. Richmond, Organometallics 15 (1996) 5292.
- [8] M.-J. Jin, D.-H. Lee, Angew. Chem. Int. Ed. 49 (2010) 1119.
- [9] W. Solodenko, K. Mennecke, C. Vogt, S. Gruhl, A. Kirschning, Synthesis 11 (2006) 1873.
- [10] E. Alacid, C. Najera, Org. Lett. 10 (2008) 5011.
- [11] M. Thomas, Y.H. Razler, F. Qian, R. Fu, R.K. Khan, W. Doubleday, J. Org. Chem. 74 (2009) 1381.
